# Supplementary material for: Concentration-dependent platinum nanoassemblies with morphology-controlled electroactivity and high durability for direct methanol fuel cells
Source: Royal Society of Chemistry journal article supplement (doi:10.1039/c5ce01045d), 2015-01-01
Supplement: c5ce01045d1.pdf [file c5ce01045d1.pdf]

Electronic Supplementary Information

**Concentration-dependent Platinum Nanoassemblies with  
Morphology-control Electroactive and High Durability for Direct  
Methanol Fuel Cells**

Niri Wu, Quanyu Suo, Hui Wang, Zhanzhong Wang, Zhanli Chai\* and Xiaojing Wang\*

Chemistry and Chemical Engineering Department, Inner Mongolia University, Inner Mongolia  
010021, People's Republic of China

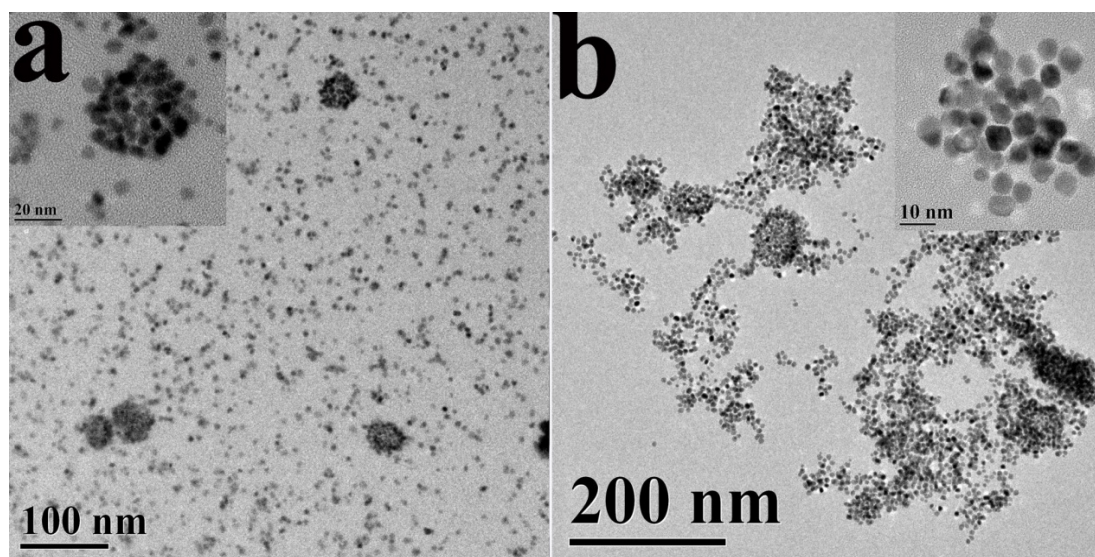

**Fig. S1** TEM images of as-obtained Pt nanostructures in typical synthesis for (a) 36h and (b) 60h.

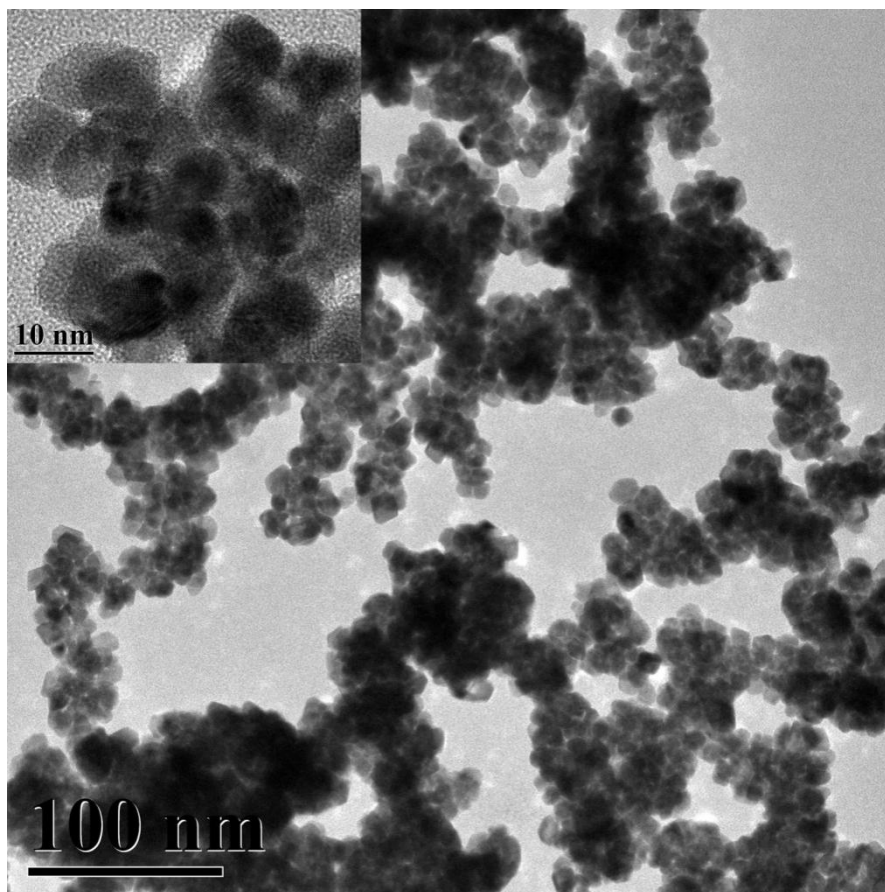

**Fig. S2** TEM and HRTEM(insets) images of of as-obtained Pt nanostructures in typical synthesis without PVP.

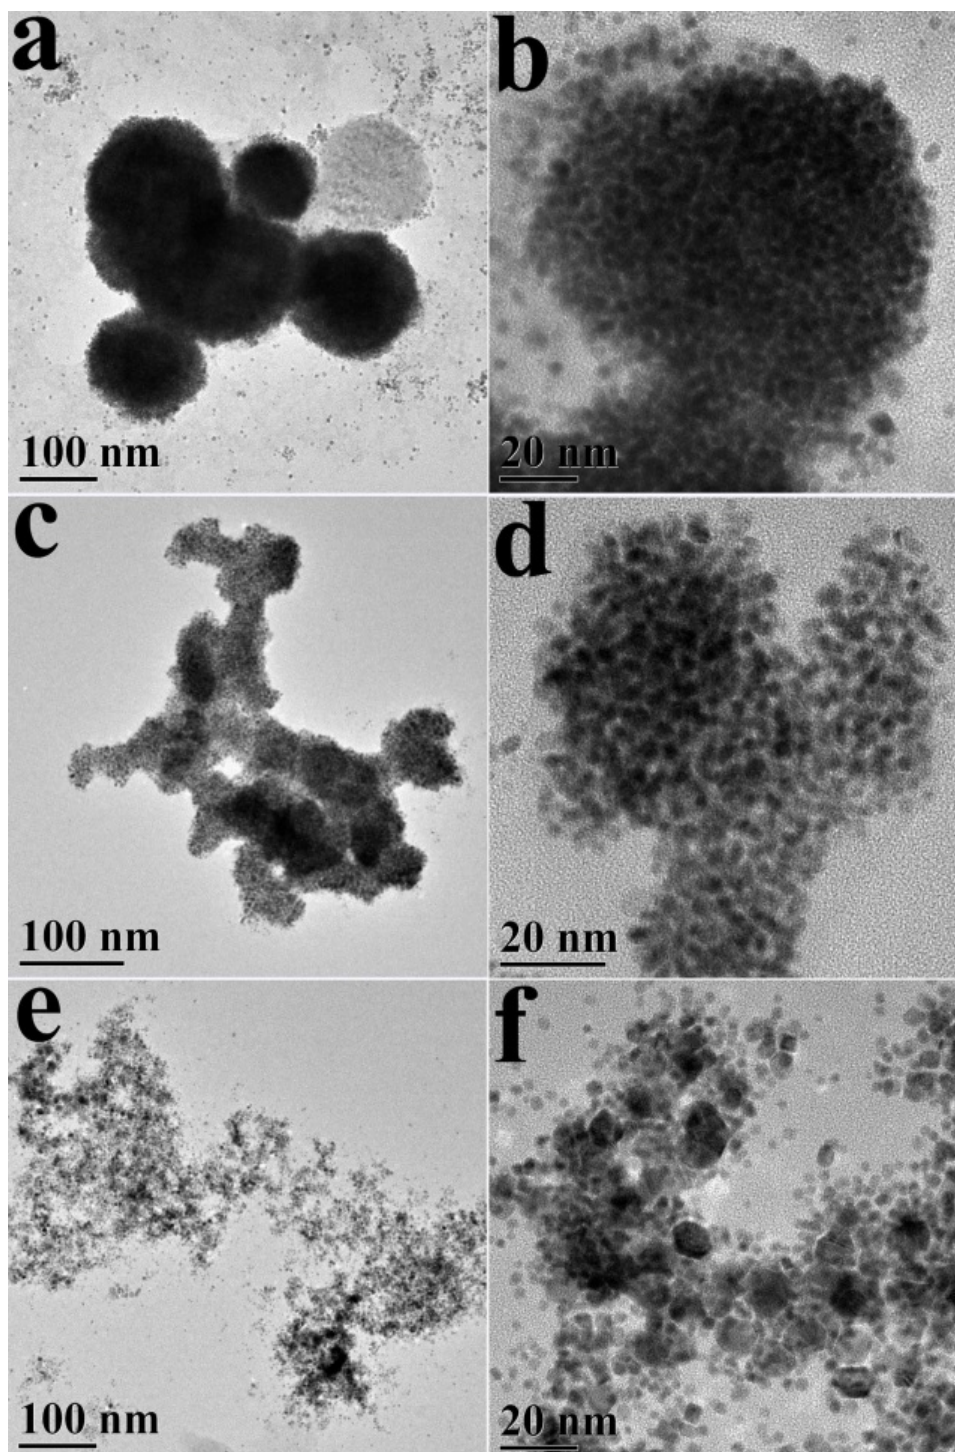

**Fig. S3** TEM images of Pt nanostructures synthesized in typical synthesis with the substitution for water of toluene (a-b), cyclohexane (c-d), DMF (e-f).

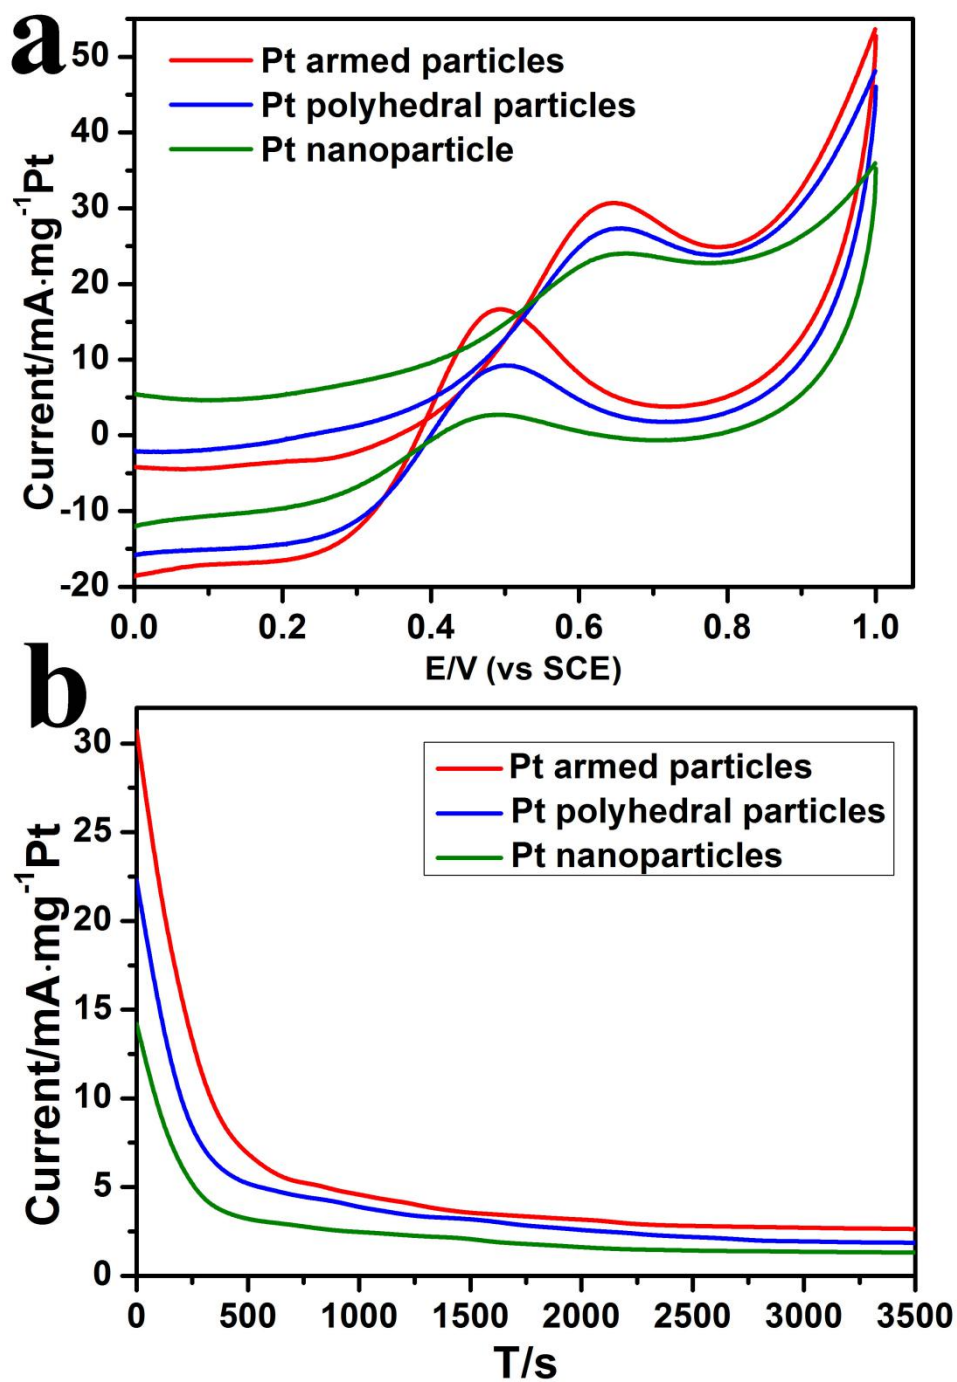

**Fig. S4** Cyclic voltammograms (a) and chronoamperometric curves at 0.65 V (b) in 0.5 M H<sub>2</sub>SO<sub>4</sub> + 0.5 M methanol of electrodes prepared by monodispersed Pt nanoparticles with different shapes as shown in Fig. 7.

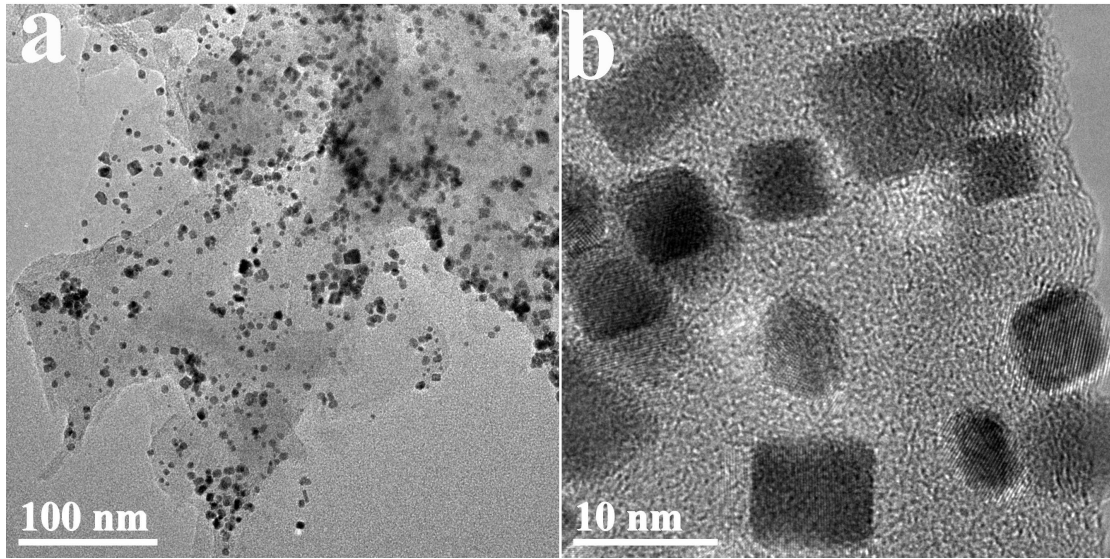

**Fig. S5** TEM images of Pt NA-d electrode after 3500s in the process of methanol electro-oxidation measured at 0.5 M  $\text{H}_2\text{SO}_4$  containing 0.5 M  $\text{CH}_3\text{OH}$  solution at 0.65 V.
